# Supplementary material for: Reaction of Li/Cl phosphinidenoid complexes with a phosphite substituted ketone: access to complexes with a novel mixed-valence polycyclic P,C-ligand system
Source: Royal Society of Chemistry journal article supplement (doi:10.1039/c3dt50902h), 2013-01-01
Supplement: c3dt50902h.pdf [file c3dt50902h.pdf]

## Electronic Supporting Information

**“Reaction of Li/Cl phosphinidenoid complexes with phosphite substituted ketones: access to complexes with a novel mixed-valence polycyclic P,C-ligand system”**

*Liliya Abdrakhmanova, Arturo Espinosa\* and Rainer Streubel\**

### Content:

- 1) **Figure S1:** Calculated model structures for **5c**, **5c<sup>conf</sup>** and **6c**.
- 2) **Cartesian coordinates and energies** for all computed species

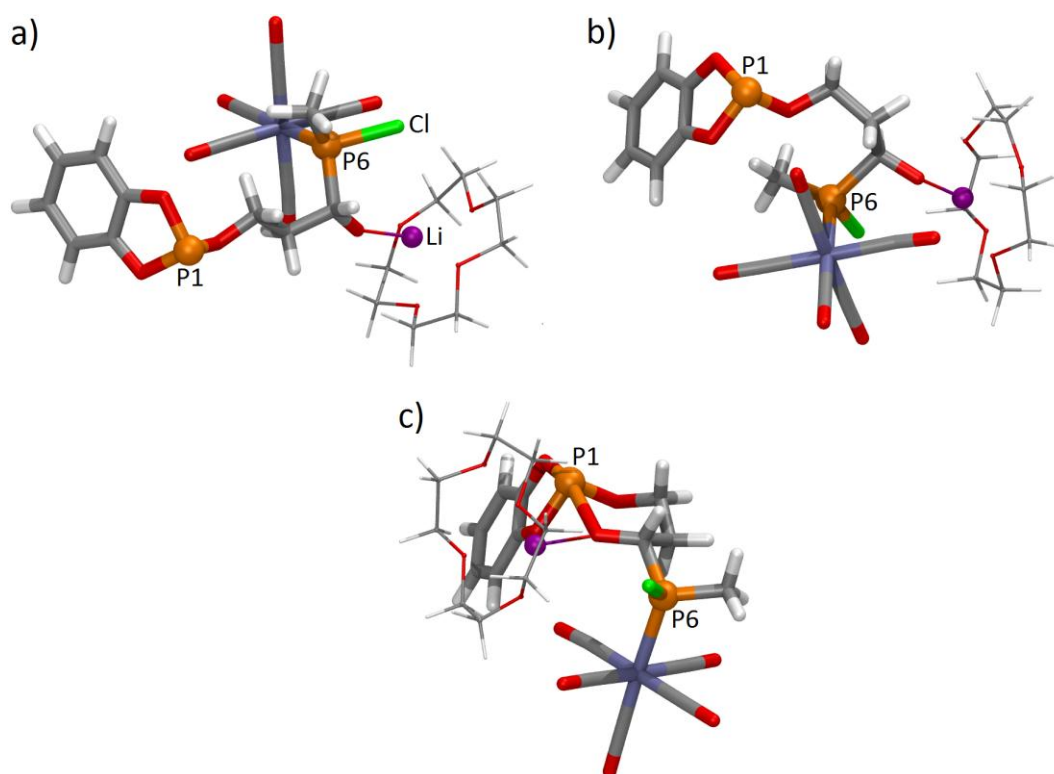

**Figure S1:** Calculated (COSMO<sub>THF</sub>/B3LYP-D3/def2-SVP(ecp)) model structures for a) **5c**, b) **5c<sup>conf</sup>** and c) **6c**.

**Cartesian coordinates (Å) and energies (au) for all computed species.**

| Compound <b>2c</b> : |           |           | $E_{\text{THF}} = -2098.176422726$ au |   |           |           |           |
|----------------------|-----------|-----------|---------------------------------------|---|-----------|-----------|-----------|
| P                    | -0.205746 | -0.072560 | -0.109557                             | H | -1.259785 | -4.998356 | 1.652924  |
| W                    | 2.411473  | -0.176075 | 0.149503                              | H | 0.190317  | -4.889030 | 0.593359  |
| C                    | 4.434362  | -0.251140 | 0.188154                              | O | -0.470410 | -3.087955 | 1.427387  |
| C                    | 2.425407  | 0.387168  | -1.858105                             | C | -0.269811 | -2.950780 | 2.835753  |
| C                    | 2.354049  | 1.816179  | 0.698351                              | H | -0.856741 | -3.716290 | 3.374133  |
| C                    | 2.397070  | -0.699281 | 2.140683                              | H | 0.794271  | -3.070837 | 3.099629  |
| C                    | 2.175479  | -2.181612 | -0.332746                             | C | -0.758148 | -1.566408 | 3.254767  |
| O                    | 5.595027  | -0.279117 | 0.182557                              | H | -0.176449 | -0.777195 | 2.748427  |
| O                    | 2.408107  | 0.731774  | -2.955827                             | H | -0.643172 | -1.434369 | 4.345596  |
| O                    | 2.265608  | 2.922835  | 1.016772                              | O | -2.125823 | -1.498162 | 2.856447  |
| O                    | 2.437447  | -0.999333 | 3.259228                              | C | -2.793682 | -0.238650 | 2.823101  |
| O                    | 1.988221  | -3.292985 | -0.576249                             | H | -2.146877 | 0.526551  | 2.353352  |
| C                    | -0.669998 | 1.647380  | -0.651986                             | H | -3.065839 | 0.108870  | 3.836308  |
| H                    | -0.019952 | 2.020878  | -1.457725                             | C | -4.055404 | -0.456531 | 1.995948  |
| H                    | -1.720766 | 1.683043  | -0.979101                             | H | -4.708928 | -1.181120 | 2.513175  |
| H                    | -0.545094 | 2.303622  | 0.226259                              | H | -4.606133 | 0.494900  | 1.888613  |
| Cl                   | -0.621198 | -1.061502 | -2.048954                             | O | -3.670901 | -0.975105 | 0.721026  |
| Li                   | -1.868618 | -1.791163 | 0.896160                              | C | -4.542544 | -1.902490 | 0.071762  |
| O                    | -2.749969 | -3.424153 | 0.159253                              | H | -5.102651 | -2.483516 | 0.826979  |
| C                    | -1.647782 | -4.193334 | -0.316089                             | H | -5.266924 | -1.377274 | -0.575973 |
| H                    | -1.117117 | -3.648451 | -1.116853                             | C | -3.677188 | -2.845446 | -0.757987 |
| H                    | -1.977909 | -5.172619 | -0.706978                             | H | -3.137495 | -2.286832 | -1.545018 |
| C                    | -0.742302 | -4.383456 | 0.894999                              | H | -4.307766 | -3.616738 | -1.235865 |

Compound **3<sup>mod</sup>**:

$E_{\text{THF}} = -990.574494578$  au

|   |           |           |           |   |           |           |           |
|---|-----------|-----------|-----------|---|-----------|-----------|-----------|
| C | 0.222873  | -0.079802 | 0.373332  | C | -5.547929 | -3.376746 | -1.483972 |
| O | 1.431806  | -0.097886 | 0.382715  | C | -4.808250 | -4.512127 | -1.125184 |
| H | -0.331472 | 0.862807  | 0.627279  | O | -4.095038 | -4.324720 | 0.037602  |
| C | -0.629094 | -1.279710 | 0.028473  | C | -6.356579 | -3.367005 | -2.613526 |
| H | -0.316039 | -2.122361 | 0.667997  | C | -6.416009 | -4.543088 | -3.381786 |
| H | -0.392203 | -1.577549 | -1.008562 | C | -5.679475 | -5.678325 | -3.020932 |
| C | -2.119295 | -1.021858 | 0.169730  | C | -4.855386 | -5.676344 | -1.880532 |
| H | -2.375128 | -0.764101 | 1.214540  | H | -6.925142 | -2.474304 | -2.881265 |
| H | -2.430009 | -0.173884 | -0.463473 | H | -7.046282 | -4.566113 | -4.274243 |
| O | -2.826904 | -2.194338 | -0.253005 | H | -5.745830 | -6.582117 | -3.631929 |
| P | -4.171222 | -2.713188 | 0.547507  | H | -4.274022 | -6.551602 | -1.584178 |
| O | -5.390724 | -2.349944 | -0.583987 |   |           |           |           |

Compound **4c**·Li(12-c-4)Cl:

$E_{\text{THF}} = -3088.79090585$  au

|    |           |           |           |   |           |           |          |
|----|-----------|-----------|-----------|---|-----------|-----------|----------|
| W  | -0.705756 | 0.062510  | -0.242952 | H | -3.823920 | -4.807665 | 1.938241 |
| P  | -0.276672 | -0.054661 | 2.304620  | C | -3.785578 | -4.132339 | 3.989247 |
| C  | -0.840461 | 0.083957  | -2.261181 | H | -4.769191 | -4.599818 | 4.174521 |
| C  | -2.718192 | 0.468190  | -0.093136 | H | -3.000394 | -4.836248 | 4.319083 |
| C  | -0.472421 | 2.122000  | -0.159175 | O | -3.695541 | -2.896926 | 4.698346 |
| C  | 1.373259  | -0.150053 | -0.412037 | C | -4.470006 | -2.747441 | 5.885317 |
| C  | -1.075663 | -1.978066 | -0.149317 | H | -5.289143 | -3.488152 | 5.893920 |
| O  | -0.883024 | 0.079487  | -3.419115 | H | -3.848287 | -2.908365 | 6.783947 |
| O  | -3.833302 | 0.766882  | -0.041552 | C | -5.079379 | -1.342827 | 5.897582 |
| O  | -0.401383 | 3.269885  | -0.101093 | H | -4.317511 | -0.563140 | 6.085327 |
| O  | 2.514712  | -0.181398 | -0.522328 | H | -5.843874 | -1.267729 | 6.692211 |
| O  | -1.358548 | -3.090713 | -0.047214 | C | -1.215935 | -1.241777 | 3.475201 |
| C  | 1.092884  | 0.964065  | 3.001994  | O | -2.507642 | -0.654880 | 3.390404 |
| H  | 2.009463  | 0.723723  | 2.450743  | H | -1.195398 | -2.238861 | 3.026612 |
| H  | 0.820948  | 2.022819  | 2.869695  | C | -0.716035 | -1.207418 | 4.922654 |
| H  | 1.240573  | 0.756203  | 4.070781  | H | 0.383464  | -1.172557 | 4.936337 |
| Cl | 1.448225  | -2.014408 | 2.276304  | H | -1.016783 | -2.137844 | 5.429657 |
| Li | -4.266087 | -1.351583 | 3.287913  | H | -2.341932 | -0.355546 | 6.077747 |
| O  | -5.644018 | -1.182709 | 4.608392  | H | -0.745057 | 0.277116  | 6.534490 |
| C  | -6.443255 | -0.061604 | 4.264905  | C | -1.365911 | -0.037876 | 5.684499 |
| H  | -5.850447 | 0.866523  | 4.334086  | O | -1.568092 | 1.159138  | 4.891461 |
| H  | -7.319197 | 0.027169  | 4.931935  | P | -2.007284 | 1.052023  | 3.313724 |
| C  | -6.914889 | -0.333458 | 2.838294  | O | -1.682979 | 2.735053  | 2.973906 |
| H  | -7.567078 | -1.226040 | 2.849153  | C | -2.813141 | 3.446096  | 2.732071 |
| H  | -7.506388 | 0.520811  | 2.460206  | C | -3.963497 | 2.650067  | 2.820336 |
| O  | -5.778609 | -0.579525 | 2.017593  | O | -3.659046 | 1.356257  | 3.145230 |
| C  | -5.942564 | -1.449841 | 0.899430  | C | -2.910015 | 4.789738  | 2.386133 |
| H  | -6.859719 | -2.051959 | 1.024090  | C | -4.193300 | 5.313062  | 2.144184 |
| H  | -6.020973 | -0.871754 | -0.036386 | C | -5.336453 | 4.509878  | 2.232866 |
| C  | -4.742679 | -2.391576 | 0.839153  | C | -5.232565 | 3.149130  | 2.569368 |
| H  | -3.824895 | -1.867303 | 0.523727  | H | -2.011210 | 5.402124  | 2.295563 |
| H  | -4.935105 | -3.209456 | 0.122399  | H | -4.296281 | 6.363850  | 1.862032 |
| O  | -4.601115 | -2.876966 | 2.164053  | H | -6.319981 | 4.937998  | 2.023437 |
| C  | -3.638313 | -3.869218 | 2.491993  | H | -6.108500 | 2.502625  | 2.619917 |
| H  | -2.622688 | -3.519527 | 2.238025  |   |           |           |          |

Compound **4c'**·Li(12-c-4)Cl:

$E_{\text{THF}} = -3088.784511792$  au

|   |           |           |           |    |           |           |           |
|---|-----------|-----------|-----------|----|-----------|-----------|-----------|
| W | -0.003246 | 0.102866  | -0.132316 | O  | -0.984633 | 3.176615  | 0.061254  |
| P | 0.045753  | 0.048492  | 2.487817  | O  | 3.056360  | 1.125759  | -0.159701 |
| C | -0.013406 | 0.241745  | -2.141996 | O  | 0.899613  | -2.960256 | -0.572006 |
| C | -1.978077 | -0.547156 | -0.163009 | C  | 0.706677  | 1.514383  | 3.393161  |
| C | -0.638952 | 2.080279  | 0.018492  | H  | 1.757442  | 1.668089  | 3.104459  |
| C | 1.970054  | 0.745259  | -0.120575 | H  | 0.102828  | 2.382239  | 3.101046  |
| C | 0.596714  | -1.870661 | -0.354380 | H  | 0.637301  | 1.367650  | 4.481035  |
| O | -0.009585 | 0.313023  | -3.300298 | Cl | -2.313592 | 1.012654  | 2.740144  |
| O | -3.060161 | -0.932754 | -0.227144 | Li | 0.845200  | -2.301139 | 6.238191  |

|   |           |           |          |   |           |           |          |
|---|-----------|-----------|----------|---|-----------|-----------|----------|
| O | 1.609595  | -3.966988 | 6.919271 | H | 1.127389  | -4.991516 | 5.176686 |
| C | 3.013159  | -3.822119 | 6.718966 | H | 1.256423  | -6.011883 | 6.637798 |
| H | 3.240342  | -3.743909 | 5.640135 | C | -0.553891 | -1.227987 | 3.790506 |
| H | 3.569866  | -4.680062 | 7.136090 | O | 0.642609  | -1.560026 | 4.485849 |
| C | 3.395665  | -2.545722 | 7.459150 | H | -1.269987 | -0.719279 | 4.444399 |
| H | 3.264007  | -2.706439 | 8.544056 | C | -1.131053 | -2.463183 | 3.080243 |
| H | 4.455534  | -2.294476 | 7.272872 | H | -1.651696 | -2.158129 | 2.160423 |
| O | 2.534800  | -1.500338 | 7.020049 | H | -1.868266 | -2.962372 | 3.727909 |
| C | 2.156434  | -0.509258 | 7.972173 | H | 0.179259  | -4.082676 | 3.679531 |
| H | 2.276930  | -0.903290 | 8.996378 | H | -0.275366 | -4.137499 | 1.961084 |
| H | 2.783447  | 0.393862  | 7.868709 | C | -0.006715 | -3.467094 | 2.789664 |
| C | 0.696413  | -0.151943 | 7.736150 | O | 1.239167  | -2.852513 | 2.397508 |
| H | 0.570038  | 0.302410  | 6.733809 | P | 1.767619  | -1.444163 | 3.047253 |
| H | 0.355260  | 0.578836  | 8.489771 | O | 2.945673  | -1.213368 | 1.771823 |
| O | -0.036889 | -1.373354 | 7.816983 | C | 4.212051  | -1.419626 | 2.184870 |
| C | -1.395156 | -1.378282 | 7.385646 | C | 4.273840  | -1.729928 | 3.551963 |
| H | -1.496366 | -0.825985 | 6.433479 | O | 3.027822  | -1.761406 | 4.130023 |
| H | -2.056486 | -0.891644 | 8.124120 | C | 5.372133  | -1.318525 | 1.422470 |
| C | -1.805649 | -2.834799 | 7.213644 | C | 6.602924  | -1.536618 | 2.066223 |
| H | -1.756520 | -3.341936 | 8.192452 | C | 6.659821  | -1.845177 | 3.430816 |
| H | -2.845206 | -2.883855 | 6.843811 | C | 5.483091  | -1.943539 | 4.197079 |
| O | -0.917684 | -3.473597 | 6.296618 | H | 5.310744  | -1.054869 | 0.364938 |
| C | -0.556046 | -4.829139 | 6.570964 | H | 7.527856  | -1.455181 | 1.489208 |
| H | -0.736443 | -5.051472 | 7.636017 | H | 7.625838  | -2.013224 | 3.913358 |
| H | -1.159495 | -5.527066 | 5.965617 | H | 5.513843  | -2.184468 | 5.260274 |
| C | 0.926638  | -5.025386 | 6.264172 |   |           |           |          |

Compound 5c:

$E_{\text{THF}} = -3088.777127063$  au

|    |           |           |           |   |           |           |           |
|----|-----------|-----------|-----------|---|-----------|-----------|-----------|
| W  | 0.445703  | -0.137085 | 0.219494  | H | 5.194703  | 4.228468  | 1.980593  |
| P  | 0.351062  | -0.140919 | 2.762074  | C | 3.181942  | 4.471883  | 1.232272  |
| C  | 0.503083  | -0.205226 | -1.811945 | H | 3.251162  | 5.574649  | 1.228375  |
| C  | -0.586640 | 1.662160  | 0.130293  | H | 3.433332  | 4.100804  | 0.223426  |
| C  | 2.228701  | 0.945772  | 0.233825  | O | 1.865997  | 4.071800  | 1.606840  |
| C  | 1.521356  | -1.909454 | 0.366698  | C | 0.817024  | 5.019269  | 1.458173  |
| C  | -1.333633 | -1.194616 | 0.257214  | H | 1.226078  | 6.043499  | 1.528038  |
| O  | 0.517407  | -0.237642 | -2.968387 | H | 0.310662  | 4.911235  | 0.481820  |
| O  | -1.148511 | 2.665547  | 0.076409  | C | -0.186727 | 4.795243  | 2.584418  |
| O  | 3.221505  | 1.519602  | 0.150300  | H | -0.741312 | 3.852361  | 2.441085  |
| O  | 2.123783  | -2.886199 | 0.469850  | H | -0.914252 | 5.628448  | 2.609246  |
| O  | -2.324540 | -1.780975 | 0.308101  | C | 1.979842  | 0.321301  | 3.714241  |
| C  | -0.439020 | -1.622372 | 3.529198  | O | 2.315642  | 1.555356  | 3.377039  |
| H  | -1.523078 | -1.592290 | 3.346015  | H | 1.659969  | 0.172273  | 4.782988  |
| H  | -0.031193 | -2.521336 | 3.043961  | C | 3.090455  | -0.694312 | 3.368166  |
| H  | -0.248695 | -1.655196 | 4.613135  | H | 3.990365  | -0.314080 | 3.879801  |
| Cl | -0.926399 | 1.344342  | 3.587322  | H | 3.300316  | -0.639320 | 2.287942  |
| Li | 1.943309  | 3.302777  | 3.549671  | C | 2.893597  | -2.143312 | 3.775497  |
| O  | 0.585997  | 4.740196  | 3.774251  | H | 2.662302  | -2.224037 | 4.855085  |
| C  | -0.050728 | 4.563633  | 5.026882  | H | 2.071870  | -2.624441 | 3.224416  |
| H  | -0.569229 | 3.589771  | 5.065305  | O | 4.099923  | -2.854618 | 3.452386  |
| H  | -0.792892 | 5.360250  | 5.221268  | P | 4.529860  | -4.225966 | 4.259950  |
| C  | 1.066502  | 4.634396  | 6.062093  | O | 3.381579  | -5.333337 | 3.656807  |
| H  | 1.433003  | 5.674091  | 6.134101  | C | 3.779979  | -5.781977 | 2.418069  |
| H  | 0.678705  | 4.334016  | 7.053454  | C | 5.100787  | -5.419541 | 2.117620  |
| O  | 2.122619  | 3.779649  | 5.639956  | O | 5.696680  | -4.705126 | 3.135594  |
| C  | 3.459534  | 4.225136  | 5.855589  | C | 3.020527  | -6.539175 | 1.537280  |
| H  | 3.482811  | 5.327807  | 5.930260  | C | 3.623432  | -6.930946 | 0.329329  |
| H  | 3.869082  | 3.807482  | 6.793745  | C | 4.939536  | -6.561539 | 0.026344  |
| C  | 4.319924  | 3.785805  | 4.680010  | C | 5.700867  | -5.791290 | 0.922711  |
| H  | 4.282640  | 2.685231  | 4.575883  | H | 1.997121  | -6.820006 | 1.792427  |
| H  | 5.366444  | 4.102922  | 4.851734  | H | 3.050506  | -7.528107 | -0.384462 |
| O  | 3.776732  | 4.400353  | 3.518305  | H | 5.386751  | -6.875279 | -0.919999 |
| C  | 4.169391  | 3.903737  | 2.241272  | H | 6.725040  | -5.486554 | 0.699313  |
| H  | 4.117732  | 2.800599  | 2.233699  |   |           |           |           |

Compound **5c'**:

$E_{\text{THF}} = -3088.766141317$  au

|    |           |           |           |   |           |           |           |
|----|-----------|-----------|-----------|---|-----------|-----------|-----------|
| W  | -0.233036 | 1.307784  | 0.087141  | H | 0.567595  | 1.165266  | 9.463207  |
| P  | -0.540704 | 0.527346  | 2.579897  | C | -1.485157 | 1.079915  | 8.778601  |
| C  | 0.026766  | 1.860070  | -1.843025 | H | -1.824878 | 0.408439  | 9.587402  |
| C  | -1.859126 | 0.123834  | -0.452099 | H | -1.695114 | 2.122222  | 9.081617  |
| C  | -1.474673 | 2.959335  | 0.279578  | O | -2.156411 | 0.752496  | 7.564784  |
| C  | 1.479742  | 2.333203  | 0.611413  | C | -3.461344 | 0.183013  | 7.654644  |
| C  | 1.037816  | -0.288275 | -0.267924 | H | -3.591317 | -0.308563 | 8.635577  |
| O  | 0.173018  | 2.179798  | -2.945855 | H | -4.242341 | 0.957285  | 7.545728  |
| O  | -2.731302 | -0.553647 | -0.770512 | C | -3.595282 | -0.859929 | 6.552070  |
| O  | -2.160619 | 3.884225  | 0.300917  | H | -3.613282 | -0.388615 | 5.551276  |
| O  | 2.488082  | 2.828218  | 0.873288  | H | -4.532405 | -1.431615 | 6.683654  |
| O  | 1.774164  | -1.137566 | -0.518848 | C | -0.395209 | 1.505315  | 4.375650  |
| C  | 0.484187  | -0.947280 | 2.922550  | O | 0.027111  | 0.682647  | 5.310884  |
| H  | 0.225379  | -1.745803 | 2.213286  | H | -1.467603 | 1.819814  | 4.462456  |
| H  | 1.531479  | -0.646973 | 2.754178  | C | 0.463946  | 2.775294  | 4.119532  |
| H  | 0.355120  | -1.270991 | 3.965068  | H | 1.340921  | 2.551620  | 3.486911  |
| Cl | -2.492210 | -0.310359 | 2.883887  | H | 0.854258  | 3.094387  | 5.099717  |
| Li | -0.896826 | -0.434717 | 6.447720  | C | -0.374910 | 3.899842  | 3.513363  |
| O  | -2.451728 | -1.692574 | 6.690090  | H | -0.799914 | 3.590786  | 2.547173  |
| C  | -2.271101 | -2.782120 | 5.802761  | H | -1.222768 | 4.127102  | 4.176929  |
| H  | -2.313872 | -2.434700 | 4.753654  | O | 0.310609  | 5.155336  | 3.346465  |
| H  | -3.045853 | -3.557648 | 5.952649  | P | 1.512721  | 5.487585  | 2.268921  |
| C  | -0.899098 | -3.344843 | 6.153883  | O | 0.710681  | 5.231703  | 0.775134  |
| H  | -0.941701 | -3.786737 | 7.165505  | C | 0.087644  | 6.380255  | 0.351151  |
| H  | -0.612655 | -4.135689 | 5.437672  | C | 0.407827  | 7.486253  | 1.151290  |
| O  | 0.028761  | -2.266175 | 6.137017  | O | 1.265558  | 7.162083  | 2.180462  |
| C  | 1.133170  | -2.305760 | 7.041275  | C | -0.737715 | 6.506968  | -0.759742 |
| H  | 0.902239  | -2.984514 | 7.880906  | C | -1.233455 | 7.787127  | -1.062599 |
| H  | 2.038122  | -2.680440 | 6.530423  | C | -0.905713 | 8.893200  | -0.269188 |
| C  | 1.387946  | -0.902014 | 7.584174  | C | -0.073890 | 8.755605  | 0.857271  |
| H  | 1.614596  | -0.209929 | 6.753788  | H | -0.984636 | 5.637813  | -1.369925 |
| H  | 2.240667  | -0.921751 | 8.287636  | H | -1.879688 | 7.918512  | -1.934423 |
| O  | 0.183881  | -0.496828 | 8.237156  | H | -1.299350 | 9.878817  | -0.531011 |
| C  | 0.006172  | 0.882856  | 8.553864  | H | 0.200406  | 9.606749  | 1.483473  |
| H  | 0.345639  | 1.510230  | 7.709584  |   |           |           |           |

Compound **5c<sup>conf.</sup>**:

$E_{\text{THF}} = -3088.778400923$  au

|    |           |           |           |   |           |           |           |
|----|-----------|-----------|-----------|---|-----------|-----------|-----------|
| W  | -0.487422 | 0.514989  | 1.656727  | C | -3.697245 | -5.760675 | 3.865760  |
| P  | -1.083366 | -0.726758 | 3.819835  | H | -3.704106 | -6.864768 | 3.875865  |
| C  | -0.064403 | 1.481161  | -0.074706 | H | -4.471033 | -5.409707 | 4.573489  |
| C  | 1.291895  | -0.567482 | 1.535089  | C | -4.043036 | -5.250262 | 2.466933  |
| C  | -1.406536 | -1.008521 | 0.538201  | H | -4.201384 | -4.159789 | 2.491716  |
| C  | -2.271785 | 1.551096  | 1.725659  | H | -4.969160 | -5.746710 | 2.120490  |
| C  | 0.380913  | 2.025812  | 2.763672  | O | -2.948643 | -5.546147 | 1.604093  |
| O  | 0.161772  | 2.039453  | -1.064546 | C | -2.936243 | -4.899983 | 0.335005  |
| O  | 2.255444  | -1.189139 | 1.444651  | H | -3.156848 | -3.826252 | 0.462369  |
| O  | -1.870963 | -1.754567 | -0.202197 | H | -3.678884 | -5.349089 | -0.351108 |
| O  | -3.264132 | 2.140560  | 1.711394  | C | -1.538069 | -5.083780 | -0.242500 |
| O  | 0.833590  | 2.889427  | 3.381828  | H | -1.349534 | -6.158225 | -0.419372 |
| C  | -1.005792 | 0.116367  | 5.456612  | H | -1.468030 | -4.554577 | -1.209289 |
| H  | 0.045184  | 0.318938  | 5.706098  | O | -0.584142 | -4.574366 | 0.684552  |
| H  | -1.556646 | 1.057309  | 5.393168  | C | 0.654703  | -5.263340 | 0.815149  |
| H  | -1.453160 | -0.524075 | 6.232404  | H | 0.549563  | -6.302349 | 0.455786  |
| Cl | 0.350393  | -2.246547 | 4.298600  | H | 1.447532  | -4.771574 | 0.223433  |
| Li | -1.535022 | -4.388608 | 2.527368  | C | 1.040269  | -5.279636 | 2.289717  |
| O  | -0.107847 | -5.765663 | 2.972062  | H | 1.301296  | -4.265566 | 2.644916  |
| C  | -0.091410 | -5.863771 | 4.388604  | H | 1.915235  | -5.938037 | 2.443451  |
| H  | 0.201143  | -4.900830 | 4.843111  | C | -2.612186 | -1.914606 | 3.606418  |
| H  | 0.619529  | -6.638947 | 4.730407  | O | -2.264695 | -2.748044 | 2.629847  |
| C  | -1.506084 | -6.249751 | 4.796612  | H | -2.717032 | -2.373521 | 4.626419  |
| H  | -1.735758 | -7.248942 | 4.384411  | C | -3.915637 | -1.151326 | 3.265362  |
| H  | -1.579440 | -6.301595 | 5.899193  | H | -4.639484 | -1.950886 | 3.029484  |
| O  | -2.412745 | -5.287219 | 4.268264  | H | -3.771588 | -0.589903 | 2.328977  |

|   |           |           |          |   |           |          |          |
|---|-----------|-----------|----------|---|-----------|----------|----------|
| C | -4.554180 | -0.261145 | 4.312380 | C | -3.157164 | 2.910603 | 8.321995 |
| H | -5.562039 | 0.044225  | 3.977142 | C | -1.884340 | 3.351640 | 8.725285 |
| H | -4.670773 | -0.793327 | 5.272507 | C | -0.933180 | 3.769397 | 7.785936 |
| O | -3.744248 | 0.906572  | 4.548706 | C | -1.222312 | 3.761899 | 6.410169 |
| P | -4.417692 | 2.407394  | 4.677388 | H | -3.907680 | 2.573271 | 9.039525 |
| O | -4.617717 | 2.535499  | 6.368085 | H | -1.633093 | 3.362645 | 9.789422 |
| C | -3.437451 | 2.913016  | 6.961681 | H | 0.049829  | 4.104828 | 8.125231 |
| C | -2.484595 | 3.334265  | 6.023583 | H | -0.487276 | 4.057278 | 5.660190 |
| O | -2.946636 | 3.243982  | 4.729089 |   |           |          |          |

Compound **5c**<sup>conf.</sup>:

$E_{\text{THF}} = -3088.775334816$  au

|    |           |           |           |   |          |           |           |
|----|-----------|-----------|-----------|---|----------|-----------|-----------|
| W  | -0.699632 | -0.070433 | 0.725632  | H | 7.007333 | 4.178918  | -1.962098 |
| P  | 1.733827  | 0.133927  | -0.125231 | C | 5.974318 | 3.217743  | -3.612557 |
| C  | -2.633059 | -0.347082 | 1.272273  | H | 6.038717 | 4.128870  | -4.233158 |
| C  | -0.072577 | -1.477382 | 2.129864  | H | 6.804040 | 2.546430  | -3.895547 |
| C  | -0.521678 | 1.448095  | 2.118515  | O | 4.712498 | 2.581252  | -3.817494 |
| C  | -1.277319 | 1.348762  | -0.675602 | C | 3.973729 | 2.930728  | -4.988899 |
| C  | -0.861286 | -1.576350 | -0.704583 | H | 4.217060 | 3.965154  | -5.290546 |
| O  | -3.738399 | -0.523779 | 1.568072  | H | 4.219727 | 2.258259  | -5.830004 |
| O  | 0.247698  | -2.269884 | 2.898134  | C | 2.483735 | 2.843117  | -4.675347 |
| O  | -0.460757 | 2.303346  | 2.891314  | H | 2.178088 | 1.801014  | -4.471655 |
| O  | -1.601493 | 2.140439  | -1.449238 | H | 1.902044 | 3.216257  | -5.539008 |
| O  | -0.938500 | -2.405235 | -1.498488 | C | 3.006506 | 1.615852  | 0.164887  |
| C  | 2.772562  | -1.366839 | -0.081313 | O | 3.833982 | 1.724110  | -0.867022 |
| H  | 2.294502  | -2.186013 | -0.634385 | H | 2.272371 | 2.450846  | 0.286774  |
| H  | 3.751644  | -1.126792 | -0.520455 | C | 3.769181 | 1.470875  | 1.501968  |
| H  | 2.892910  | -1.657399 | 0.968984  | H | 4.421016 | 2.361192  | 1.521972  |
| Cl | 1.558456  | 0.300455  | -2.252641 | H | 4.450639 | 0.606525  | 1.457709  |
| Li | 3.535823  | 2.965671  | -2.155451 | C | 2.976125 | 1.439586  | 2.801823  |
| O  | 2.286556  | 3.652846  | -3.529735 | H | 3.568478 | 1.899528  | 3.613878  |
| C  | 1.004748  | 3.808470  | -2.942051 | H | 2.042607 | 2.014281  | 2.724650  |
| H  | 0.626696  | 2.842130  | -2.570765 | O | 2.617906 | 0.089814  | 3.169032  |
| H  | 0.272240  | 4.217275  | -3.663066 | P | 3.509320 | -0.603158 | 4.382666  |
| C  | 1.214822  | 4.799038  | -1.802617 | O | 2.850076 | -2.141618 | 4.239734  |
| H  | 1.416355  | 5.798279  | -2.228784 | C | 3.479720 | -2.828869 | 3.224419  |
| H  | 0.303548  | 4.861495  | -1.180041 | C | 4.665982 | -2.202793 | 2.813415  |
| O  | 2.331915  | 4.368989  | -1.030200 | O | 4.918232 | -1.051384 | 3.522827  |
| C  | 3.234802  | 5.368940  | -0.565833 | C | 3.017896 | -3.985282 | 2.614230  |
| H  | 3.212001  | 6.237613  | -1.248382 | C | 3.783672 | -4.511116 | 1.559418  |
| H  | 2.955584  | 5.720817  | 0.444639  | C | 4.967693 | -3.887265 | 1.146272  |
| C  | 4.645301  | 4.796453  | -0.551894 | C | 5.427618 | -2.715389 | 1.771370  |
| H  | 4.715307  | 3.927844  | 0.124009  | H | 2.080155 | -4.438315 | 2.937306  |
| H  | 5.354268  | 5.573174  | -0.208671 | H | 3.435577 | -5.409882 | 1.044965  |
| O  | 4.924384  | 4.396403  | -1.886231 | H | 5.539026 | -4.306357 | 0.314562  |
| C  | 6.077355  | 3.607011  | -2.141800 | H | 6.332793 | -2.203027 | 1.440194  |
| H  | 6.067609  | 2.711459  | -1.493736 |   |          |           |           |

Compound **6c**:

$E_{\text{THF}} = -3088.778940854$  au

|   |           |           |           |    |           |           |          |
|---|-----------|-----------|-----------|----|-----------|-----------|----------|
| W | 0.127204  | -0.076953 | -0.046887 | H  | 1.628466  | 0.916604  | 4.273582 |
| P | 0.188186  | -0.021799 | 2.500550  | Cl | 0.522902  | -1.927591 | 3.385034 |
| C | 0.136199  | -0.053680 | -2.080993 | Li | -3.770240 | -0.979170 | 2.533655 |
| C | -0.355934 | -2.102891 | -0.026070 | O  | -4.002194 | -2.446104 | 4.043985 |
| C | -1.890531 | 0.410892  | -0.079001 | C  | -4.293751 | -1.707843 | 5.221805 |
| C | 0.634673  | 1.931739  | 0.007479  | H  | -3.697196 | -0.776921 | 5.228602 |
| C | 2.138753  | -0.588430 | -0.012715 | H  | -4.044468 | -2.293675 | 6.128292 |
| O | 0.145608  | -0.037041 | -3.237309 | C  | -5.788420 | -1.408176 | 5.219209 |
| O | -0.593712 | -3.227643 | -0.026162 | H  | -6.345373 | -2.354515 | 5.334166 |
| O | -3.004289 | 0.677530  | -0.184129 | H  | -6.029706 | -0.768692 | 6.087335 |
| O | 0.926233  | 3.045221  | 0.067799  | O  | -6.180410 | -0.755080 | 4.020443 |
| O | 3.253289  | -0.876838 | 0.019248  | C  | -7.145175 | -1.406390 | 3.209188 |
| C | 1.688119  | 0.816249  | 3.179251  | H  | -7.200983 | -2.476695 | 3.473290 |
| H | 2.570260  | 0.218940  | 2.908929  | H  | -8.147999 | -0.961887 | 3.361070 |
| H | 1.779992  | 1.808974  | 2.714570  | C  | -6.777089 | -1.297549 | 1.739606 |

|   |           |           |           |   |           |          |           |
|---|-----------|-----------|-----------|---|-----------|----------|-----------|
| H | -6.829429 | -0.256730 | 1.383171  | H | -1.217504 | 2.439966 | 2.117530  |
| H | -7.499833 | -1.892069 | 1.149182  | H | -0.191256 | 2.618190 | 3.564311  |
| O | -5.469380 | -1.817115 | 1.605288  | C | -2.234124 | 3.092124 | 3.878552  |
| C | -4.945143 | -2.078967 | 0.315111  | H | -2.333887 | 2.810462 | 4.944193  |
| H | -4.577299 | -1.148464 | -0.154855 | H | -1.944641 | 4.154185 | 3.839097  |
| H | -5.704882 | -2.521743 | -0.356074 | O | -3.496537 | 3.011868 | 3.215992  |
| C | -3.815250 | -3.081919 | 0.520619  | P | -4.570337 | 1.826732 | 3.621268  |
| H | -4.254265 | -4.058089 | 0.787404  | O | -5.981944 | 2.811249 | 3.459912  |
| H | -3.231019 | -3.204348 | -0.408265 | C | -6.391863 | 2.878406 | 2.160159  |
| O | -2.972216 | -2.629354 | 1.578852  | C | -5.721781 | 1.951979 | 1.343698  |
| C | -2.570405 | -3.589272 | 2.557139  | O | -4.839474 | 1.180405 | 2.051615  |
| H | -3.232620 | -4.468810 | 2.497235  | C | -7.363308 | 3.727218 | 1.640776  |
| H | -1.533441 | -3.914890 | 2.370023  | C | -7.664329 | 3.622340 | 0.270527  |
| C | -2.685183 | -2.965021 | 3.939702  | C | -6.993044 | 2.701174 | -0.542481 |
| H | -1.956950 | -2.150174 | 4.063555  | C | -6.002252 | 1.853178 | -0.013695 |
| H | -2.482884 | -3.737512 | 4.706966  | H | -7.873714 | 4.440890 | 2.290830  |
| C | -1.311390 | 0.729895  | 3.490325  | H | -8.428415 | 4.273415 | -0.162582 |
| O | -2.505377 | 0.212602  | 3.186054  | H | -7.243459 | 2.632172 | -1.604527 |
| H | -0.984099 | 0.546814  | 4.548041  | H | -5.464037 | 1.137923 | -0.635629 |
| C | -1.163608 | 2.247690  | 3.203014  |   |           |          |           |

**Compound 6c':**

$E_{\text{THF}} = -3088.781856772$  au

|    |           |           |           |   |           |           |           |
|----|-----------|-----------|-----------|---|-----------|-----------|-----------|
| W  | 0.062576  | -0.130308 | -0.260703 | H | 8.389882  | -0.738570 | -2.379705 |
| P  | 2.590730  | 0.111298  | 0.242516  | C | 7.403169  | 1.028021  | -1.595270 |
| C  | -1.897756 | -0.161574 | -0.794700 | H | 8.371511  | 1.563633  | -1.566195 |
| C  | 0.586827  | -1.584934 | -1.644866 | H | 6.871924  | 1.355315  | -2.510221 |
| C  | -0.387895 | -1.578843 | 1.152450  | O | 6.656057  | 1.311895  | -0.429347 |
| C  | -0.207343 | 1.330968  | 1.196477  | C | 6.415058  | 2.695677  | -0.187366 |
| C  | 0.330670  | 1.338994  | -1.710703 | H | 7.324314  | 3.282082  | -0.420989 |
| O  | -3.007035 | -0.157281 | -1.121071 | H | 5.595160  | 3.055569  | -0.834134 |
| O  | 0.935985  | -2.378342 | -2.403683 | C | 6.049479  | 2.885050  | 1.269634  |
| O  | -0.704712 | -2.374057 | 1.924767  | H | 5.294073  | 2.130706  | 1.532840  |
| O  | -0.297119 | 2.135515  | 2.013334  | H | 5.603547  | 3.890012  | 1.404192  |
| O  | 0.426891  | 2.149543  | -2.520503 | C | 3.520835  | -0.432350 | 1.867495  |
| C  | 3.724623  | -0.434875 | -1.082513 | O | 4.854893  | -0.354003 | 1.785131  |
| H  | 3.352652  | -0.084494 | -2.055136 | H | 3.060420  | 0.286577  | 2.594606  |
| H  | 4.723503  | -0.027838 | -0.878892 | C | 2.980574  | -1.838280 | 2.212034  |
| H  | 3.750958  | -1.535980 | -1.074715 | H | 3.340718  | -2.576482 | 1.474181  |
| Cl | 2.980980  | 2.203090  | 0.216666  | H | 1.881535  | -1.844330 | 2.183371  |
| Li | 6.530400  | -0.489564 | 1.074344  | C | 3.394627  | -2.306540 | 3.605434  |
| O  | 7.202877  | 2.734666  | 2.078666  | H | 3.295602  | -1.482351 | 4.336180  |
| C  | 7.063078  | 1.951218  | 3.250942  | H | 2.737725  | -3.123003 | 3.939643  |
| H  | 6.125332  | 1.368923  | 3.218531  | O | 4.721513  | -2.857318 | 3.649158  |
| H  | 7.048481  | 2.586905  | 4.158520  | P | 6.062131  | -1.910540 | 3.614932  |
| C  | 8.230091  | 0.986914  | 3.319963  | O | 7.127475  | -3.033236 | 4.362192  |
| H  | 9.183716  | 1.538216  | 3.388300  | C | 7.829455  | -3.781019 | 3.456683  |
| H  | 8.138620  | 0.347098  | 4.213312  | C | 7.575396  | -3.391122 | 2.133705  |
| O  | 8.239744  | 0.138418  | 2.169232  | O | 6.685047  | -2.355648 | 2.057912  |
| C  | 9.198466  | 0.465026  | 1.169642  | C | 8.731711  | -4.800520 | 3.742036  |
| H  | 8.927407  | 1.419811  | 0.693747  | C | 9.377435  | -5.427703 | 2.660459  |
| H  | 10.204173 | 0.574519  | 1.617119  | C | 9.116474  | -5.038938 | 1.340840  |
| C  | 9.240818  | -0.686597 | 0.178669  | C | 8.202849  | -4.006231 | 1.058636  |
| H  | 9.586543  | -1.594377 | 0.698170  | H | 8.931125  | -5.096684 | 4.774233  |
| H  | 9.954269  | -0.454286 | -0.630617 | H | 10.090895 | -6.231269 | 2.861548  |
| O  | 7.948944  | -1.000358 | -0.350999 | H | 9.629802  | -5.540599 | 0.516979  |
| C  | 7.616735  | -0.480824 | -1.633646 | H | 7.994083  | -3.665488 | 0.043195  |
| H  | 6.685902  | -0.992438 | -1.922681 |   |           |           |           |

**Compound 6c<sup>top</sup>:**

$E_{\text{THF}} = -3088.781545189$  au

|   |           |           |           |   |           |           |           |
|---|-----------|-----------|-----------|---|-----------|-----------|-----------|
| W | -0.045788 | -0.850848 | 0.928259  | C | -0.775775 | 0.756569  | -0.182470 |
| P | 0.399699  | 0.711464  | 2.882561  | C | 1.855673  | -0.392477 | 0.245874  |
| C | -0.384995 | -2.145142 | -0.604496 | C | 0.770832  | -2.410026 | 2.019825  |
| C | -1.940843 | -1.275447 | 1.662046  | O | -0.595067 | -2.912296 | -1.443645 |



|    |           |           |           |   |           |           |          |
|----|-----------|-----------|-----------|---|-----------|-----------|----------|
| O  | -2.977620 | -1.538629 | 2.085078  | O | -3.833717 | 1.335823  | 0.860315 |
| O  | -1.125337 | 1.612199  | -0.866260 | C | -4.849736 | 0.926497  | 1.782638 |
| O  | 2.915828  | -0.117357 | -0.113230 | H | -5.763317 | 1.523159  | 1.620130 |
| O  | 1.252324  | -3.272230 | 2.612964  | H | -5.091437 | -0.140993 | 1.640384 |
| C  | 2.024869  | 0.504886  | 3.715469  | C | -4.370633 | 1.161616  | 3.205302 |
| H  | 2.092993  | -0.500241 | 4.155482  | H | -3.477537 | 0.558894  | 3.438345 |
| H  | 2.804001  | 0.606748  | 2.943403  | H | -5.174754 | 0.869792  | 3.906762 |
| H  | 2.167216  | 1.267159  | 4.495591  | C | 0.203844  | 2.571293  | 2.598476 |
| Cl | -0.908818 | 0.460442  | 4.535274  | O | -0.996372 | 2.857156  | 2.060492 |
| Li | -2.751933 | 2.832046  | 1.899005  | H | 0.334483  | 2.982258  | 3.627076 |
| O  | -4.085800 | 2.549053  | 3.305177  | C | 1.395902  | 3.073304  | 1.736395 |
| C  | -3.753469 | 3.115163  | 4.571089  | H | 1.615342  | 2.383292  | 0.901871 |
| H  | -2.664716 | 3.041783  | 4.730525  | H | 2.307129  | 3.153732  | 2.353047 |
| H  | -4.271047 | 2.580765  | 5.387753  | C | 1.042963  | 4.424414  | 1.118259 |
| C  | -4.209015 | 4.581083  | 4.550698  | H | 1.923024  | 4.880815  | 0.638907 |
| H  | -5.295298 | 4.644880  | 4.743175  | H | 0.266934  | 4.279097  | 0.347759 |
| H  | -3.695564 | 5.121906  | 5.361825  | O | 0.576619  | 5.355661  | 2.109964 |
| O  | -3.894347 | 5.225466  | 3.324563  | P | -1.062205 | 5.442188  | 2.376502 |
| C  | -4.945100 | 5.322498  | 2.375649  | O | -1.097507 | 4.909145  | 4.013945 |
| H  | -5.676151 | 4.509888  | 2.523298  | C | -1.033407 | 5.940721  | 4.898062 |
| H  | -5.472296 | 6.291550  | 2.484645  | C | -1.032201 | 7.196596  | 4.268379 |
| C  | -4.406899 | 5.221546  | 0.958933  | O | -1.076083 | 7.095094  | 2.911217 |
| H  | -3.632420 | 5.988265  | 0.776662  | C | -1.002565 | 5.825812  | 6.282209 |
| H  | -5.243266 | 5.401659  | 0.259256  | C | -0.986755 | 7.010706  | 7.041658 |
| O  | -3.875398 | 3.920056  | 0.764715  | C | -0.993340 | 8.262459  | 6.417019 |
| C  | -3.837383 | 3.337840  | -0.528399 | C | -1.011677 | 8.370098  | 5.013468 |
| H  | -2.812616 | 3.402391  | -0.929909 | H | -0.996820 | 4.840173  | 6.752751 |
| H  | -4.513033 | 3.861912  | -1.226389 | H | -0.969053 | 6.945346  | 8.133148 |
| C  | -4.286611 | 1.869915  | -0.384867 | H | -0.984292 | 9.171972  | 7.023062 |
| H  | -5.386114 | 1.807428  | -0.432627 | H | -1.016990 | 9.339589  | 4.510817 |
| H  | -3.873108 | 1.269349  | -1.211207 |   |           |           |          |

Compound **6c**<sup>top</sup>:

E<sub>THF</sub> = -3088.781949924 au

|    |           |           |           |   |          |           |           |
|----|-----------|-----------|-----------|---|----------|-----------|-----------|
| W  | 0.192223  | -0.523619 | 0.040492  | O | 8.524255 | -0.946448 | 0.155339  |
| P  | 2.712717  | -0.289629 | 0.499493  | C | 8.040234 | -0.541339 | -1.117080 |
| C  | -1.778548 | -0.580300 | -0.462710 | H | 7.088467 | -1.060916 | -1.342426 |
| C  | 0.740664  | -0.608810 | -1.953926 | H | 8.767691 | -0.762236 | -1.920236 |
| C  | 0.245564  | -2.595868 | 0.137614  | C | 7.816156 | 0.962634  | -1.012541 |
| C  | -0.266898 | -0.506362 | 2.075803  | H | 8.782044 | 1.453236  | -0.797376 |
| C  | 0.162938  | 1.551763  | 0.004006  | H | 7.430161 | 1.355513  | -1.970122 |
| O  | -2.893088 | -0.589156 | -0.771845 | O | 6.894989 | 1.216677  | 0.043468  |
| O  | 1.083566  | -0.673692 | -3.052720 | C | 7.150406 | 2.299249  | 0.931183  |
| O  | 0.257345  | -3.746456 | 0.184878  | H | 8.237693 | 2.486589  | 0.994217  |
| O  | -0.526715 | -0.514975 | 3.195500  | H | 6.657721 | 3.225203  | 0.583736  |
| O  | 0.164966  | 2.703053  | -0.002001 | C | 6.633363 | 1.915551  | 2.314294  |
| C  | 3.547000  | 0.975008  | -0.523884 | H | 5.532104 | 1.826578  | 2.324205  |
| H  | 3.093556  | 1.960848  | -0.349035 | H | 6.934759 | 2.685350  | 3.050239  |
| H  | 4.623746  | 0.980968  | -0.300283 | C | 3.942076 | -1.756556 | 0.488453  |
| H  | 3.387821  | 0.692370  | -1.577955 | O | 5.210383 | -1.373956 | 0.595061  |
| Cl | 3.123194  | 0.459743  | 2.450144  | H | 3.545039 | -2.318910 | 1.368784  |
| Li | 6.711779  | -0.641845 | 1.175574  | C | 3.672581 | -2.629025 | -0.761663 |
| O  | 7.235641  | 0.666257  | 2.598807  | H | 3.853798 | -2.049624 | -1.684798 |
| C  | 6.891656  | -0.063404 | 3.769009  | H | 2.636846 | -2.998474 | -0.785027 |
| H  | 5.828832  | -0.371366 | 3.730090  | C | 4.634233 | -3.811771 | -0.755902 |
| H  | 7.057568  | 0.531529  | 4.686114  | H | 4.391863 | -4.523803 | -1.560075 |
| C  | 7.812650  | -1.281708 | 3.769980  | H | 5.665303 | -3.447731 | -0.901955 |
| H  | 8.849601  | -0.954574 | 3.969285  | O | 4.541199 | -4.539677 | 0.484414  |
| H  | 7.504554  | -1.985835 | 4.564179  | P | 5.719127 | -4.414083 | 1.633048  |
| O  | 7.734541  | -1.894032 | 2.490650  | O | 4.888475 | -3.632570 | 2.897516  |
| C  | 8.907909  | -2.442135 | 1.914208  | C | 4.129254 | -4.523531 | 3.611035  |
| H  | 9.795057  | -1.868946 | 2.240122  | C | 4.445381 | -5.855018 | 3.298494  |
| H  | 9.046878  | -3.499958 | 2.205587  | O | 5.426873 | -5.941917 | 2.341867  |
| C  | 8.755418  | -2.323826 | 0.405346  | C | 3.156314 | -4.213628 | 4.554126  |
| H  | 7.898313  | -2.930491 | 0.061264  | C | 2.505375 | -5.282262 | 5.197535  |
| H  | 9.666654  | -2.688231 | -0.104899 | C | 2.825884 | -6.610544 | 4.890446  |



|   |          |           |          |   |          |           |          |
|---|----------|-----------|----------|---|----------|-----------|----------|
| C | 3.806469 | -6.916171 | 3.927344 | H | 2.303775 | -7.424111 | 5.400212 |
| H | 2.909874 | -3.173691 | 4.778931 | H | 4.065150 | -7.945278 | 3.668381 |
| H | 1.735693 | -5.065781 | 5.943481 |   |          |           |          |
